# Supplementary material
Source: PubMed Central journal article supplement (PMC10925855)
Supplement: mmc1.pdf [file mmc1.pdf]

Smith SM et al.

*Polymorphisms in the choline transporter SLC44A1 are associated with reduced cognitive performance in both normotypic and prenatal alcohol-exposed children.*

Supplementary Tables 1-3  
Supplementary Figure 1 and legend

**Supplementary Table 1. Variants in *SLC44A1* that were evaluated in the study participants.**

| <b>POSTION<br/>GRCh38</b> | <b>ID</b>     | <b>REF</b> | <b>ALT</b>    | <b>Location</b> |
|---------------------------|---------------|------------|---------------|-----------------|
| 105,244,650-904           | <b>Exon 1</b> |            |               | Exon 1          |
| 105,244,667               | rs390529      | T          | C             | Exon 1 (5'UTR)  |
| 105,244,725               | rs555397265   | C          | CCAGCCGCCGCTG | Exon 1 (5'UTR)  |
| 105,245,799               | rs167867      | G          | A             | Intron 1        |
| 105,245,878               | rs327960      | A          | C             | Intron 1        |
| 105,248,163               | rs170582      | G          | A             | Intron 1        |
| 105,252,720               | rs75106836    | T          | C             | Intron 1        |
| 105,254,308               | rs116350994   | G          | C             | Intron 1        |
| 105,255,270               | rs79085380    | G          | C             | Intron 1        |
| 105,255,507               | rs140200024   | GTTTAA     | G             | Intron 1        |
| 105,256,650               | rs116747281   | T          | A             | Intron 1        |
| 105,260,869               | rs76992248    | C          | T             | Intron 1        |
| 105,262,345               | rs327994      | C          | T             | Intron 1        |
| 105,264,780               | rs76992248    | T          | G             | Intron 1        |
| 105,268,318               | rs78837910    | C          | T             | Intron 1        |
| 105,270,070               | rs79632593    | T          | C             | Intron 1        |
| 105,273,898               | rs34668343    | T          | C             | Intron 1        |
| 105,274,748               | rs79971185    | G          | A             | Intron 1        |
| 105,276,512               | rs74847242    | G          | T             | Intron 1        |
| 105,278,539               | rs150185127   | C          | T             | Intron 1        |
| 105,278,601               | rs111877278   | G          | A             | Intron 1        |
| 105,279,809               | rs79223354    | A          | G             | Intron 1        |
| 105,280,580               | rs71494513    | A          | G             | Intron 1        |
| 105,280,614               | rs35293517    | A          | G             | Intron 1        |
| 105,281,632               | rs76054992    | A          | G             | Intron 1        |
| 105,283,226               | rs115995379   | A          | G             | Intron 1        |
| 105,283,721               | rs115467043   | A          | G             | Intron 1        |
| 105,284,839               | rs76066704    | A          | G             | Intron 1        |
| 105,285,292               | rs74773787    | T          | C             | Intron 1        |
| 105,285,891               | rs143438338   | A          | G             | Intron 1        |
| 105,286,849               | rs138013654   | AACT       | A             | Intron 1        |
| 105,289,223               | rs10991608    | C          | T             | Intron 1        |
| 105,289,232               | rs115049292   | T          | C             | Intron 1        |
| 105,290,750               | rs327982      | C          | T             | Intron 1        |
| 105,291,402               | rs59370172    | C          | T             | Intron 1        |
| 105,291,831               | rs75690841    | C          | T             | Intron 1        |

|                 |               |         |            |          |
|-----------------|---------------|---------|------------|----------|
| 105,292,685     | rs327984      | G       | A          | Intron 1 |
| 105,294,585     | rs114676441   | C       | T          | Intron 1 |
| 105,295,803     | rs114897292   | C       | T          | Intron 1 |
| 105,296,546     | rs327991      | C       | T          | Intron 1 |
| 105,297,413     | rs2089807     | C       | T          | Intron 1 |
| 105,297,774     | rs12347364    | T       | A          | Intron 1 |
| 105,298,026     | rs115441783   | A       | G          | Intron 1 |
| 105,298,131     | rs75575818    | G       | T          | Intron 1 |
| 105,298,426     | rs149357410   | C       | T          | Intron 1 |
| 105,299,219-307 | <b>Exon 2</b> |         |            | Exon 2   |
| 105,299,786     | rs116754351   | C       | T          | Intron 2 |
| 105,299,805     | rs10991609    | C       | G          | Intron 2 |
| 105,302,321     | rs114365914   | G       | A          | Intron 2 |
| 105,305,895     | rs9644967     | G       | A          | Intron 2 |
| 105,306,276     | rs76025089    | G       | A          | Intron 2 |
| 105,306,727     | rs35455036    | A       | AC         | Intron 2 |
| 105,309,586     | rs113544435   | G       | A          | Intron 2 |
| 105,309,724-865 | <b>Exon 3</b> |         |            | Exon 3   |
| 105,310,529     | rs12376222    | A       | G          | Intron 3 |
| 105,313,914     | rs112461270   | C       | T          | Intron 3 |
| 105,315,716     | rs10991619    | C       | T          | Intron 3 |
| 105,317,659     | rs76402817    | G       | T          | Intron 3 |
| 105,320,075     | rs79600643    | T       | C          | Intron 3 |
| 105,320,589     | rs142832243   | T       | A          | Intron 3 |
| 105,321,204     | rs12349416    | G       | A          | Intron 3 |
| 105,321,443     | rs77139204    | A       | G          | Intron 3 |
| 105,321,461     | rs112445608   | CAAATT  | C          | Intron 3 |
| 105,324,016     | rs138909285   | G       | T          | Intron 3 |
| 105,326,849     | rs75252146    | A       | G          | Intron 3 |
| 105,327,673     | rs12379026    | T       | A          | Intron 3 |
| 105,328,053     | rs10991625    | C       | A          | Intron 3 |
| 105,328,967     | rs73512035    | G       | A          | Intron 3 |
| 105,331,975     | rs10991629    | C       | T          | Intron 3 |
| 105,332,351     | rs13298325    | C       | A          | Intron 3 |
| 105,334,467     | rs113909391   | A       | G          | Intron 3 |
| 105,335,000     | rs10991630    | G       | A          | Intron 3 |
| 105,335,391     | rs73512040    | A       | G          | Intron 3 |
| 105,335,562-696 | <b>Exon 4</b> |         |            | Exon 4   |
| 105,338,369     | rs77491366    | G       | A          | Intron 4 |
| 105,338,437     | rs10991632    | C       | A          | Intron 4 |
| 105,338,890     | rs75638188    | T       | C          | Intron 4 |
| 105,339,231     | rs111867599   | AAAAAAA | N=11-13 As | Intron 4 |
| 105,342,624     | rs116567682   | C       | T          | Intron 4 |

|                     |                |         |     |           |
|---------------------|----------------|---------|-----|-----------|
| 105,343,266         | rs116835488    | G       | C   | Intron 4  |
| 105,343,460         | rs10991633     | A       | G   | Intron 4  |
| 105,343,745         | rs112970775    | TCAGATA | T   | Intron 4  |
| 105,344,449         | rs12377753     | A       | G   | Intron 4  |
| 105,344,478         | rs12377755     | A       | G   | Intron 4  |
| 105,345,430         | rs10991634     | C       | T   | Intron 4  |
| 105,346,125         | rs77157131     | C       | T   | Intron 4  |
| 105,346,555         | rs112651128    | G       | A   | Intron 4  |
| 105,346,871         | rs12380580     | C       | T   | Intron 4  |
| 105,348,355-449     | <b>Exon 5</b>  |         |     | Exon 5    |
| 105,349,196         | rs78132990     | C       | A   | Intron 5  |
| 105,350,842         | rs10991636     | C       | G   | Intron 5  |
| 105,351,432         | rs111442823    | G       | C   | Intron 5  |
| 105,353,266         | rs71494522     | T       | A   | Intron 5  |
| 105,354,844         | rs10991638     | G       | A   | Intron 5  |
| 105,356,208-379     | <b>Exon 6</b>  |         |     | Exon 6    |
| 105,356,772         | rs10991640     | C       | T   | Intron 6  |
| 105,357,909         | rs35533765     | A       | G   | Intron 6  |
| 105,358,344-434     | <b>Exon 7</b>  |         |     | Exon 7    |
| 105,360,791         | rs10991641     | C       | T   | Intron 7  |
| 105,361,038         | rs150451876    | C       | A   | Intron 7  |
| 105,361,187-328     | <b>Exon 8</b>  |         |     | Exon 8    |
| 105,361,698         | rs76795767     | T       | C   | Intron 8  |
| 105,362,820-363,007 | <b>Exon 9</b>  |         |     | Exon 9    |
| 105,363,170         | rs35157236     | C       | CTT | Intron 9  |
| 105,363,248         | rs34253461     | C       | T   | Intron 9  |
| 105,363,621         | rs113670898    | T       | A   | Intron 9  |
| 105,363,656         | rs80234385     | G       | A   | Intron 9  |
| 105,363,789         | rs79144680     | C       | G   | Intron 9  |
| 105,364,554-720     | <b>Exon 10</b> |         |     | Exon 10   |
| 105,365,193         | rs4538947      | G       | A   | Intron 10 |
| 105,365,483-639     | <b>Exon 11</b> |         |     | Exon 11   |
| 105,365,767         | rs7860321      | C       | T   | Intron 11 |
| 105,366,343-429     | <b>Exon 12</b> |         |     | Exon 12   |
| 105,367,199         | rs11506819     | C       | A   | Intron 12 |
| 105,368,865         | rs12379533     | C       | T   | Intron 12 |
| 105,369,272         | rs71494524     | A       | G   | Intron 12 |
| 105,371,588         | rs10991643     | G       | A   | Intron 12 |
| 105,372,094         | rs71364089     | TGACAA  | T   | Intron 12 |
| 105,373,018         | rs74344739     | T       | C   | Intron 12 |
| 105,373,364         | rs117555942    | T       | C   | Intron 12 |
| 105,373,837         | rs111516986    | T       | G   | Intron 12 |

|                     |                        |    |   |  |                 |
|---------------------|------------------------|----|---|--|-----------------|
| 105,374,595-736     | <b>Exon 13</b>         |    |   |  | Exon 13         |
| 105,379,395         | rs10991644             | A  | G |  | Intron 13       |
| 105,380,358         | rs549490262            | CT | C |  | Intron 13       |
| 105,380,558         | rs13297419             | T  | C |  | Intron 13       |
| 105,381,737         | rs71494526             | C  | G |  | Intron 13       |
| 105,381,743         | rs10991645             | C  | A |  | Intron 13       |
| 105,383,122-359     | <b>Exon 14</b>         |    |   |  | Exon 14         |
| 105,384,640         | rs71494527             | A  | G |  | Intron 14       |
| 105,385,418-502     | <b>Exon 15 (short)</b> |    |   |  |                 |
| 105,385,418-713     | <b>Exon 15 (long)</b>  |    |   |  |                 |
| 105,385,482         | rs3199966              | T  | G |  | Exon 15         |
| 105,389,033-397,056 | <b>Exon 16 (short)</b> |    |   |  |                 |
| 105,389,918         | rs2771040              | G  | A |  | Exon 16 (3'UTR) |
| 105,399,766         | rs74472811             | G  | C |  |                 |
| 105,400,131         | rs35322610             | G  | A |  |                 |
| 105,424,107         | rs117432520            | T  | A |  |                 |

Short variant of Exon 15 + Exon 16 encodes the plasma membrane variant and its 5'UTR.  
Long variant of Exon 15 encodes the mitochondrial variant and its 3'UTR.

## Supplementary Table 2

### Pairwise Linkage Disequilibrium Values for SLC44A1 Variants Associated with Any Neurobehavioral Outcome in Participants with Heavy PAE. \*

| Reference SNP | Location | SNP #2      | D'            |
|---------------|----------|-------------|---------------|
| rs75106836    | Intron 1 | rs143438338 | <b>0.9968</b> |
|               |          | rs59370172  | <b>0.9968</b> |
|               |          | rs12347364  | 0.1298        |
|               |          | rs10991629  | <b>0.8826</b> |
|               |          | rs3199966   | <b>0.9962</b> |
|               |          | rs2771040   | <b>0.9961</b> |
| rs143438338   | Intron 1 | rs59370172  | <b>0.9968</b> |
|               |          | rs12347364  | 0.2766        |
|               |          | rs10991629  | <b>0.8911</b> |
|               |          | rs3199966   | <b>0.9962</b> |
|               |          | rs2771040   | <b>0.9961</b> |
| rs59370172    | Intron 1 | rs12347364  | 0.0029        |
|               |          | rs10991629  | <b>0.9962</b> |
|               |          | rs3199966   | <b>0.9962</b> |
|               |          | rs2771040   | <b>0.9961</b> |
| rs12347364    | Intron 1 | rs10991629  | <b>0.9947</b> |
|               |          | rs3199966   | <b>0.9948</b> |
|               |          | rs2771040   | <b>0.9952</b> |
| rs10991629    | Intron 3 | rs3199966   | 0.7769        |
|               |          | rs2771040   | <b>0.9030</b> |
| rs3199966     | Exon 15  | rs2771040   | <b>0.9997</b> |

\* D', disequilibrium value for the comparison between the reference SNP and SNP #2. **Boldface** indicates pairwise associations  $\geq 0.80$ .

**Supplementary Table 3**  
**Additional SNPs in *SLC44A1* that are Associated with Neurobehavioral Measures in the Genotype × Exposure Association<sup>1</sup>**

| SNP         | Position      | LD with rs3199966 (D') | Neurobehavioral Measurement                        | P <sub>adj</sub> | B ± SE     | Effect Size | Effect Allele |
|-------------|---------------|------------------------|----------------------------------------------------|------------------|------------|-------------|---------------|
| rs75106836  | Intron 1; T>C | 0.9962                 | DAS-II, General cognitive abilities, T-score       | 0.033            | 1.33±0.62  | 2.15        | C (T>C)       |
|             |               |                        | DAS-II, Sequential quantitative reasoning, T-score | 0.035            | 1.58±0.63  | 2.51        |               |
| rs143438338 | Intron 1; C>T | 0.9962                 | DAS-II, Sequential quantitative reasoning, T-score | 0.035            | 1.59±0.63  | 2.52        | T (C>T)       |
| rs59370172  | Intron 1; C>T | 0.9962                 | DAS-II, Sequential quantitative reasoning, T-score | 0.035            | 1.59±0.64  | 2.48        | T (C>T)       |
| rs12347364  | Intron 1; T>A | 0.9948                 | CVLT, Serial cluster ratio, Z-score                | 0.0031           | -1.26±0.47 | -2.68       | A (T>A)       |
| rs10991629  | Intron 3; C>T | 0.7769                 | DAS-II, Recall of designs, T-score                 | 0.035            | 0.62±0.24  | 2.58        | T (C>T)       |
|             |               |                        | DAS-II, Sequential quantitative reasoning, T-score | 0.010            | 0.71±0.23  | 3.09        |               |

<sup>1</sup> SNPs in addition to rs3199966 and rs2771040 as presented in Table 4; D'=1.00 for rs3199966 and rs2771040. CVLTD, California Verbal Learning Test; DAS-II, Differential Abilities Scale, 2<sup>nd</sup> Ed.; SE, Standard Error. T-scores and Z-scores reflect age-normalized values that are internal to the testing instrument. P-adjusted by Bonferroni correction.

**Supplementary Table 4**  
**ANOVA Reports for the Exposure × Genotype Regression Analysis of rs3199966 and rs2771040 Presented in Figure 4.\***

| <b>Measure</b>                    | <b>Exposure</b>                                         | <b>Genotype</b>                                        | <b>Genotype × Exposure</b>               | <b>Control TT vs. Con TG</b> | <b>Control TT vs. Con GG</b> | <b>Control TT vs. PAE TT</b> | <b>Control TT vs. PAE TG</b> | <b>Control TT vs. PAE GG</b> |
|-----------------------------------|---------------------------------------------------------|--------------------------------------------------------|------------------------------------------|------------------------------|------------------------------|------------------------------|------------------------------|------------------------------|
| General Cognitive Abilities       | F <sub>(2,162)</sub> =67.41<br>p=6.57x10 <sup>-14</sup> | F <sub>(2,162)</sub> =8.965<br>p=2.03x10 <sup>-4</sup> | F <sub>(2,162)</sub> =6.424<br>p=0.0021  | p=1.33x10 <sup>-4</sup>      | p=0.041                      | p=1.0x10 <sup>-8</sup>       | p=1.0x10 <sup>-8</sup>       | p=0.0033                     |
| Recall of Designs                 | F <sub>(2,157)</sub> =40.38<br>p=2.16x10 <sup>-9</sup>  | F <sub>(2,157)</sub> =5.999<br>p=0.0031                | F <sub>(2,157)</sub> =4.146<br>p=0.0176  | p=6.26x10 <sup>-4</sup>      | p=0.278                      | p=1.0x10 <sup>-8</sup>       | p=4.3x10 <sup>-6</sup>       | p=0.0346                     |
| Nonverbal Reasoning               | F <sub>(2,162)</sub> =35.99<br>p=1.25x10 <sup>-8</sup>  | F <sub>(2,162)</sub> =3.931<br>p=0.0215                | F <sub>(2,162)</sub> =4.261<br>p=0.00157 | p=0.0153                     | p=0.230                      | p=1.0x10 <sup>-8</sup>       | p=7.06x10 <sup>-5</sup>      | p=0.186                      |
| Sequential Quantitative Reasoning | F <sub>(2,158)</sub> =50.56<br>p=3.77x10 <sup>-11</sup> | F <sub>(2,158)</sub> =8.965<br>p=2.03x10 <sup>-4</sup> | F <sub>(2,158)</sub> =6.675<br>p=0.00165 | p=0.00156                    | p=0.090                      | p=1.0x10 <sup>-8</sup>       | p=5.0x10 <sup>-7</sup>       | p=0.276                      |
| Executive Function Difficulties   | F <sub>(2,169)</sub> =256.8<br>p=2.00x10 <sup>-16</sup> | F <sub>(2,169)</sub> =0.085<br>p=0.918                 | F <sub>(2,169)</sub> =3.639<br>p=0.0283  | p=0.758                      | p=1.00                       | p=1.0x10 <sup>-8</sup>       | p=1.0x10 <sup>-8</sup>       | p=3.48x10 <sup>-5</sup>      |
|                                   |                                                         |                                                        |                                          | <b>Control AA vs. Con AG</b> | <b>Control AA vs. Con GG</b> | <b>Control AA vs. PAE AA</b> | <b>Control AA vs. PAE AG</b> | <b>Control AA vs. PAE GG</b> |
| CVLT Serial Cluster Ratio         | F <sub>(2,169)</sub> =0.005<br>p=0.944                  | F <sub>(2,169)</sub> =0.001<br>p=0.999                 | F <sub>(2,169)</sub> =1.334<br>p=0.266   | p=0.997                      | p=0.913                      | p=0.970                      | p=1.00                       | p=0.950                      |

\* All analyses were performed for rs3199966(T>G) except for CVLT Serial Cluster Ratio, which tested rs2771040(A>G). Analysis used the generalized linear regression package ‘glm’ in R and an Additive gene model, followed by two-way analysis of variance and Tukey multiple comparison of means.



# Supplementary Figure 1

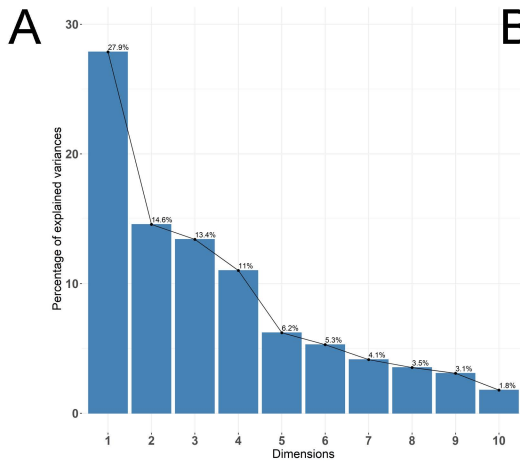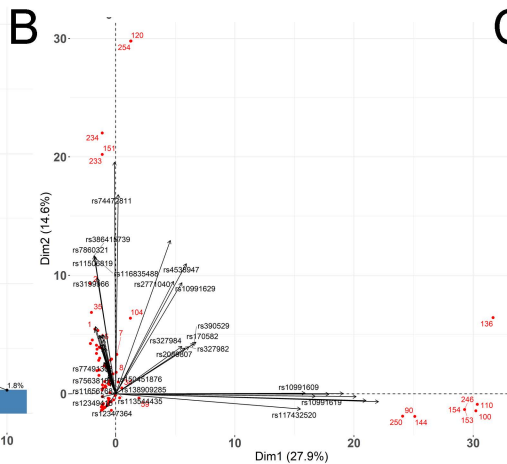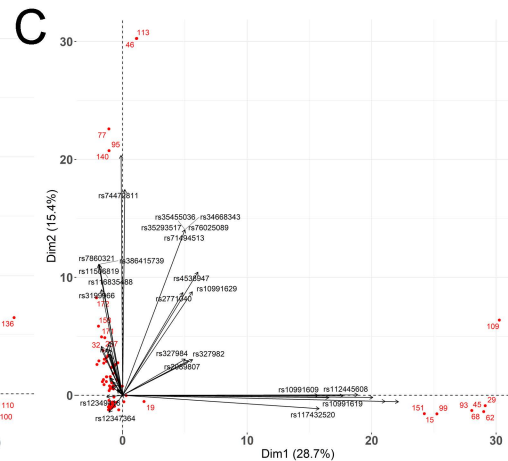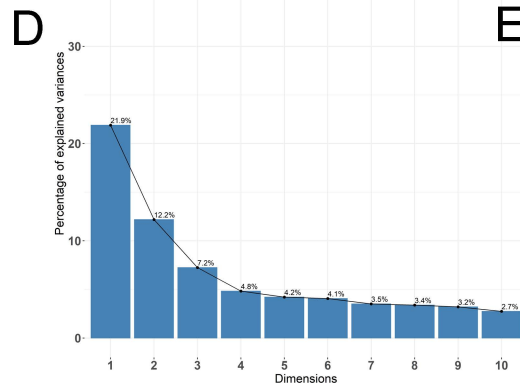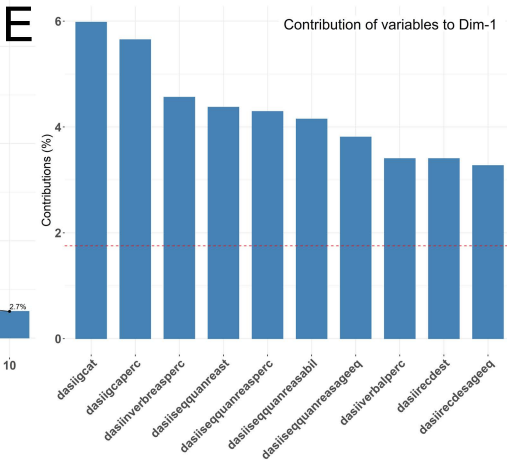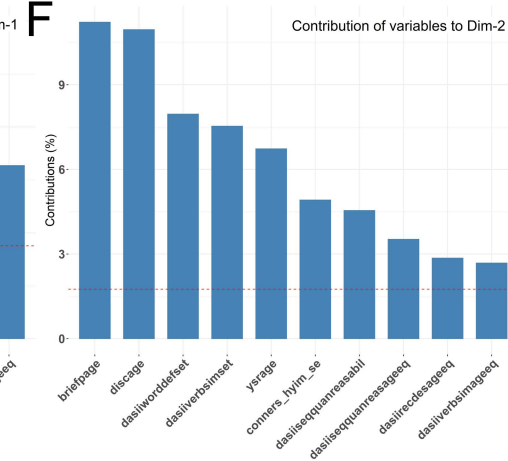

**Legend for Supplementary Figure 1. Exploration of Principal Component Analysis (PCA) Findings of Participant Characteristics.** The PCAs are presented in Figure 1. (A-C) PCA exploration for the comparison of genotype against participant characteristics (ancestry, sex, age, and PAE status) from Figures 1A-1D. (A) Loadings plot of PC dimensions 1 through 10 shows that only PC1 makes a substantial contribution (27.9%) to the variance between participants. (B) Loadings plot identifies individuals and SNPs within *SLC44A1* that contribute to the variance in both PC1 and PC2. (C) Removal of those outliers from PC1 does not appreciably change the loadings of PC1 and PC2, showing those individuals did not drive the variance. (D-F) PCA exploration of neurobehaviors against participant characteristics (ancestry, sex, age, and PAE status) from Figures 1E-1H. (D) Loadings plot of PCA dimensions 1 through 10 shows that PC1 and PC2 are the primary contributions to the variance in neurobehavioral outcomes for the participants. (E) Scree plot shows the top 10 drivers of PC1 are cognitive measures within the DAS-II instrument including general cognitive abilities T-score (*dasiigcat*) and %ile (*dasiigcaperc*); nonverbal reasoning %ile (*dasiinverbreasperc*); sequential quantitative reasoning T-score (*dasiisequanreast*), %ile (*dasiisequanreastperc*), ability score (*dasiisequanreastabil*), and age-equivalent (*dasiisequanreastageeq*); verbal ability cluster %ile (*dasiiverbalperc*); and recall of designs T-score (*dasiirecdest*) and age-equivalent (*dasiirecdesageeq*). (F) Scree plot shows the top 10 drivers of PC2 are mostly age-related measures including subject age at testing (*briefpage*, *discage*, *ysrage*); the item set administered in the word definition and verbal similarities tests (*dasiiorworddefset*; *dasiiverbsimset*), standard error on the Connors hyperactivity measurement (*conners\_hyim\_se*), sequential quantitative reasoning ability score (*dasiisequanreasabil*), and the age-equivalent measures of sequential quantitative reasoning, recall of designs, and verbal similarities (*dasiisequanreasageeq*, *dasiirecdesageeq*, *dasiiverbsimageeq*), all in DAS-II.
